# Supplementary material for: Forensic Nurses (v)ermitteln
Source: Springer Nature journal article supplement (doi:10.1007/s41906-022-1308-7), 2022-07-01
Supplement: MOESM1 [file 23270804]

## Literatur

### zum Beitrag „Forensic Nurses (v)ermitteln“

von Julian Mausbach, Valeria Kägi, Juliette Galli, Michael Thali

*PflegeZeitschrift* (75) 8/2022, S. 24-26

Berishaj K, Boyland CM, Reinink K, Lynch V. (2020) Forensic Nurse Hospitalist: The Comprehensive Role of the Forensic Nurse in a Hospital Setting. *Journal of Emergency Nursing* 2020 May;46 (3), Elsevier, S. 286-293, doi: 10.1016/j.jen.2020.03.002. PMID: 32389202.

Hofer V, Galli J, Thali MJ, Martinez RM (2020) Flying Forensic Nursing in der Versorgung und Beratung von Gewaltbetroffenen, Auswertung erster Erfahrungen mit diesem neuen Konzept / Flying forensic nursing in the care and counselling of victims of violence, Evaluation of first experiences with this new concept, *Rechtsmedizin* 2020 Volume 30, Springer, S. 311 – 317, DOI <https://doi.org/10.1007/s00194-020-00423-y>

Hooker RS, Berkowitz O (2020) A global census of physician assistants and physician associates, *Journal of the American Academy of Pas*, S. 43ff., DOI:10.1097/01.JAA.0000721668.29693.36

Drake SA, Tabor P, Hamilton H, Cannon A (2020) Nurses and Medicolegal Death Investigation, *Journal of Forensic Nursing*, PMID: 33149100 DOI: 10.1097/JFN.0000000000000310

Lynch VA (2011) Evolution of Forensic Nursing Science. In: Lynch VA, Barber Duval J. *Forensic Nursing Science*, 2. Edition Elsevier Mosby

Martinez RM, Thali M (2016) Forensic Nursing - eine neues Berufsbild in der modernen Rechtsmedizin?, *Pflegerecht* 4/2016, S. 242f.

OVC – Office for Victims of Crime (2015) Legal and Ethical Foundations for SANE Practice, Chapter 4.6. Forensic Nursing Scope and Standards of Practice. <https://www.ovcttac.gov/saneguide/legal-and-ethical-foundations-for-sane-practice/> (letzter Zugriff am 01.06.2022)

Profil Forensic Nurse, Schweizerischer Verband Forensic Nursing, abrufbar unter: [http://forensicnursing.ch/wp-content/uploads/2021/06/Profil\\_Forensic\\_Nurse\\_FINAL\\_GV\\_2021.pdf](http://forensicnursing.ch/wp-content/uploads/2021/06/Profil_Forensic_Nurse_FINAL_GV_2021.pdf)

Romano C (2011) Examining the role of the forensic nurse death investigator. *Nursing: January* 2011 - Volume 111, S. 20 f., doi: 10.1097/01.NAJ.0000392855.52189.ce

## Quellen

<https://www.goafn.org/forensicnursing> (AFN - Academy of Forensic Nursing; letzter Zugriff am 01.06.2022)

[www.swissforensicnurses.ch](http://www.swissforensicnurses.ch) (Swiss Association Forensic Nursing, letzter Zugriff am 01.06.2022)

[https://irm.uzh.ch/dam/jcr:41941f9a-76e0-4205-ac23-fd7e170c03da/Flyer\\_Anmeldung\\_FNF\\_Pilatus.pdf](https://irm.uzh.ch/dam/jcr:41941f9a-76e0-4205-ac23-fd7e170c03da/Flyer_Anmeldung_FNF_Pilatus.pdf) (Institut für Rechtsmedizin, Universität Zürich, letzter Zugriff am 01.06.2022)

<http://forensicnursing.ch/verein-safn-swiss-association-forensic-nursing/> (Statuten Schweizerischer Verband Forensic Nursing, letzter Zugriff am 01.06.2022)
